# Supplementary figures and images for: Decoupling sensory from decisional choice biases in perceptual decision making
Source: eLife journal article supplement (doi:10.7554/elife.43994), 2019-03-27

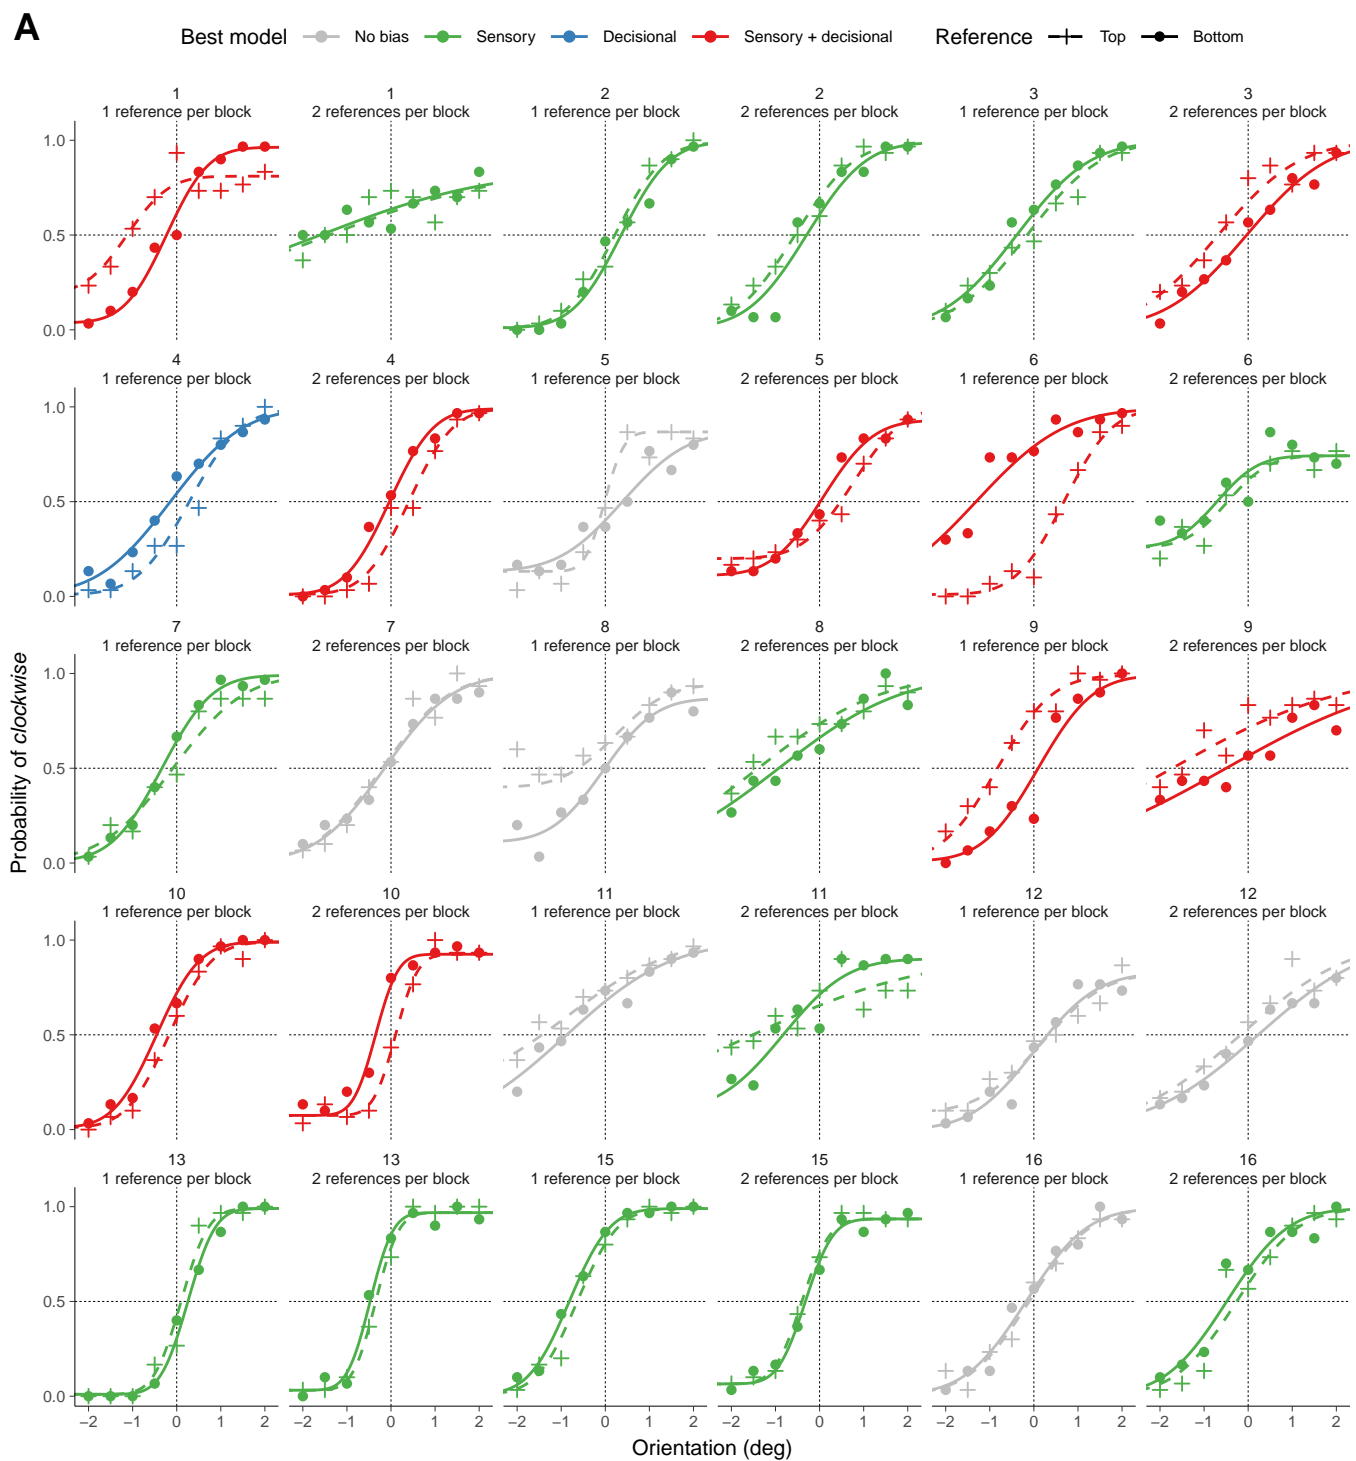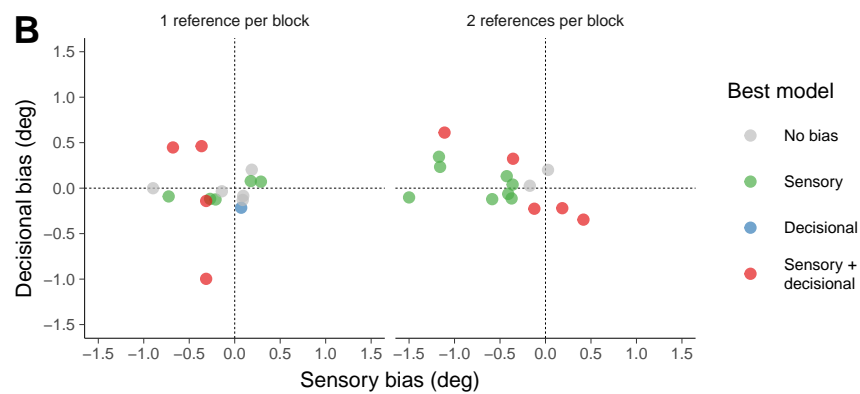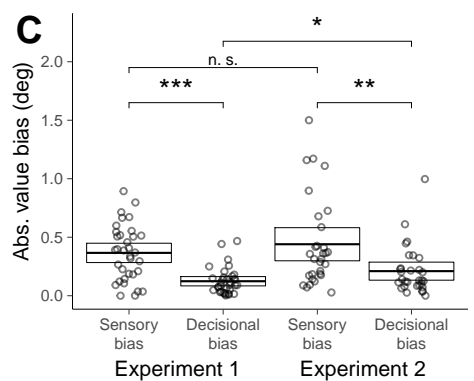

Supplement: supp [file elife-43994-supp-v1.zip]

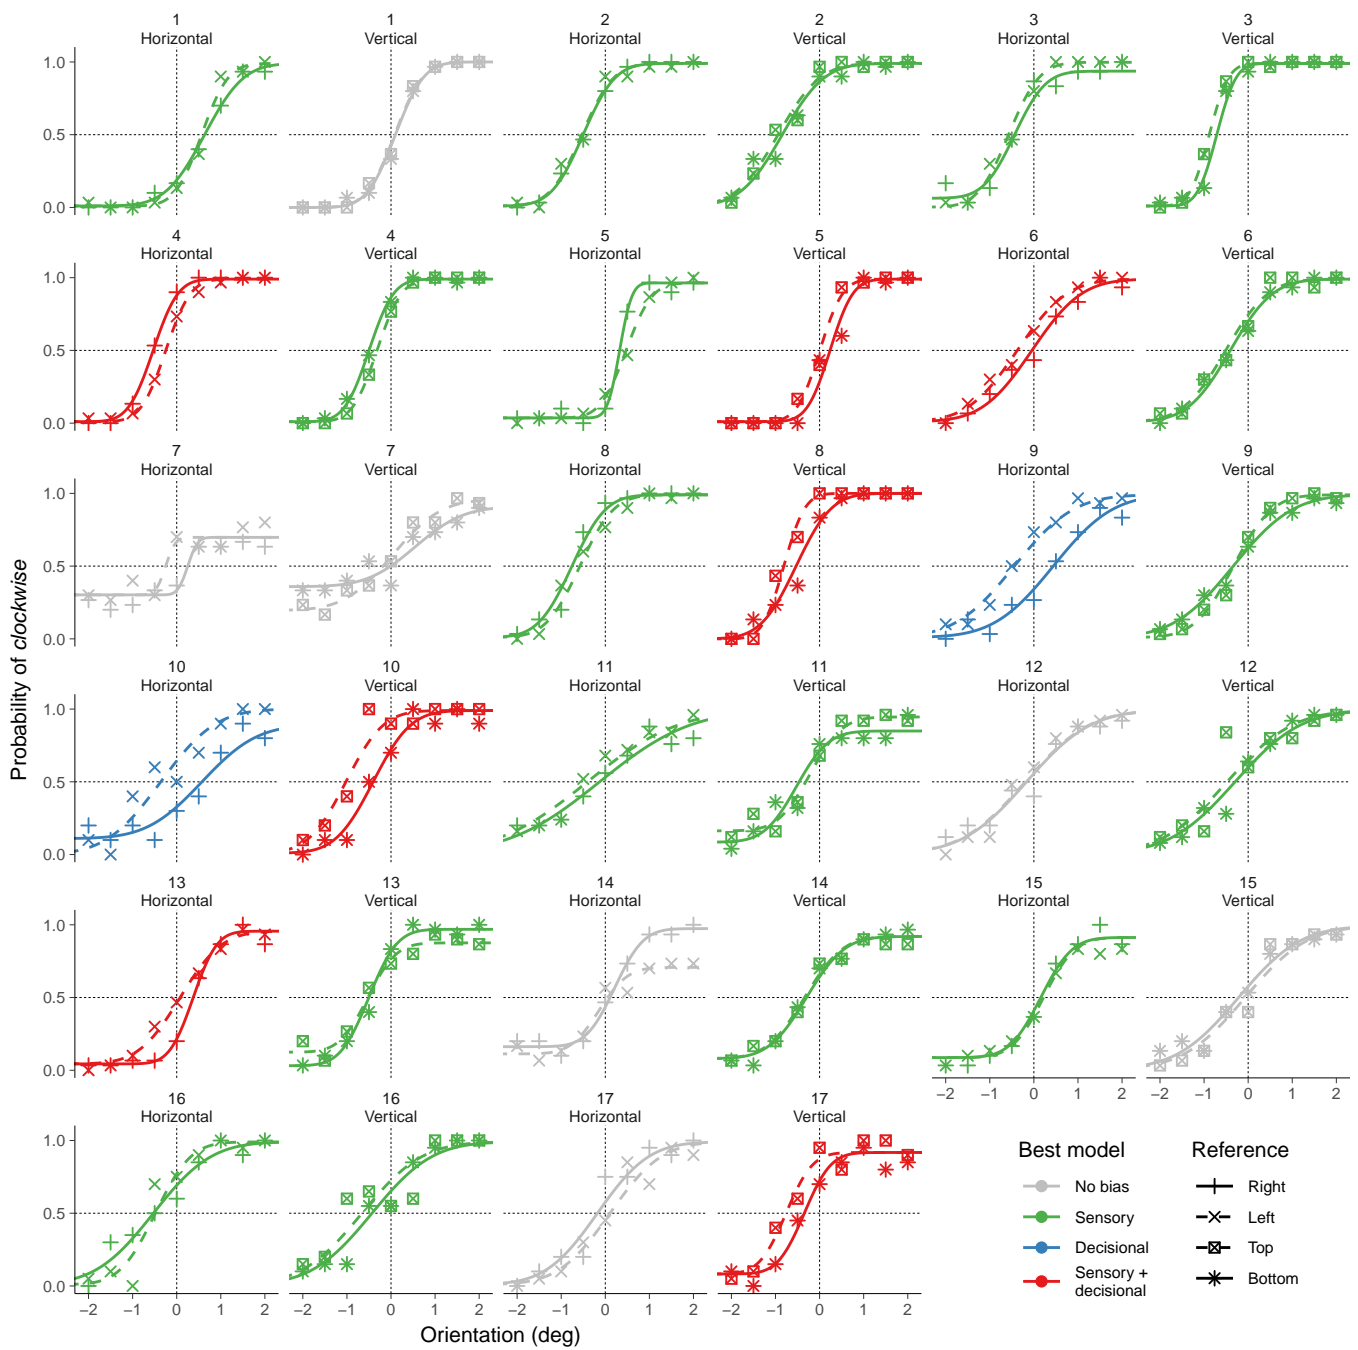

Supplement: supp [file elife-43994-supp-v1.zip]

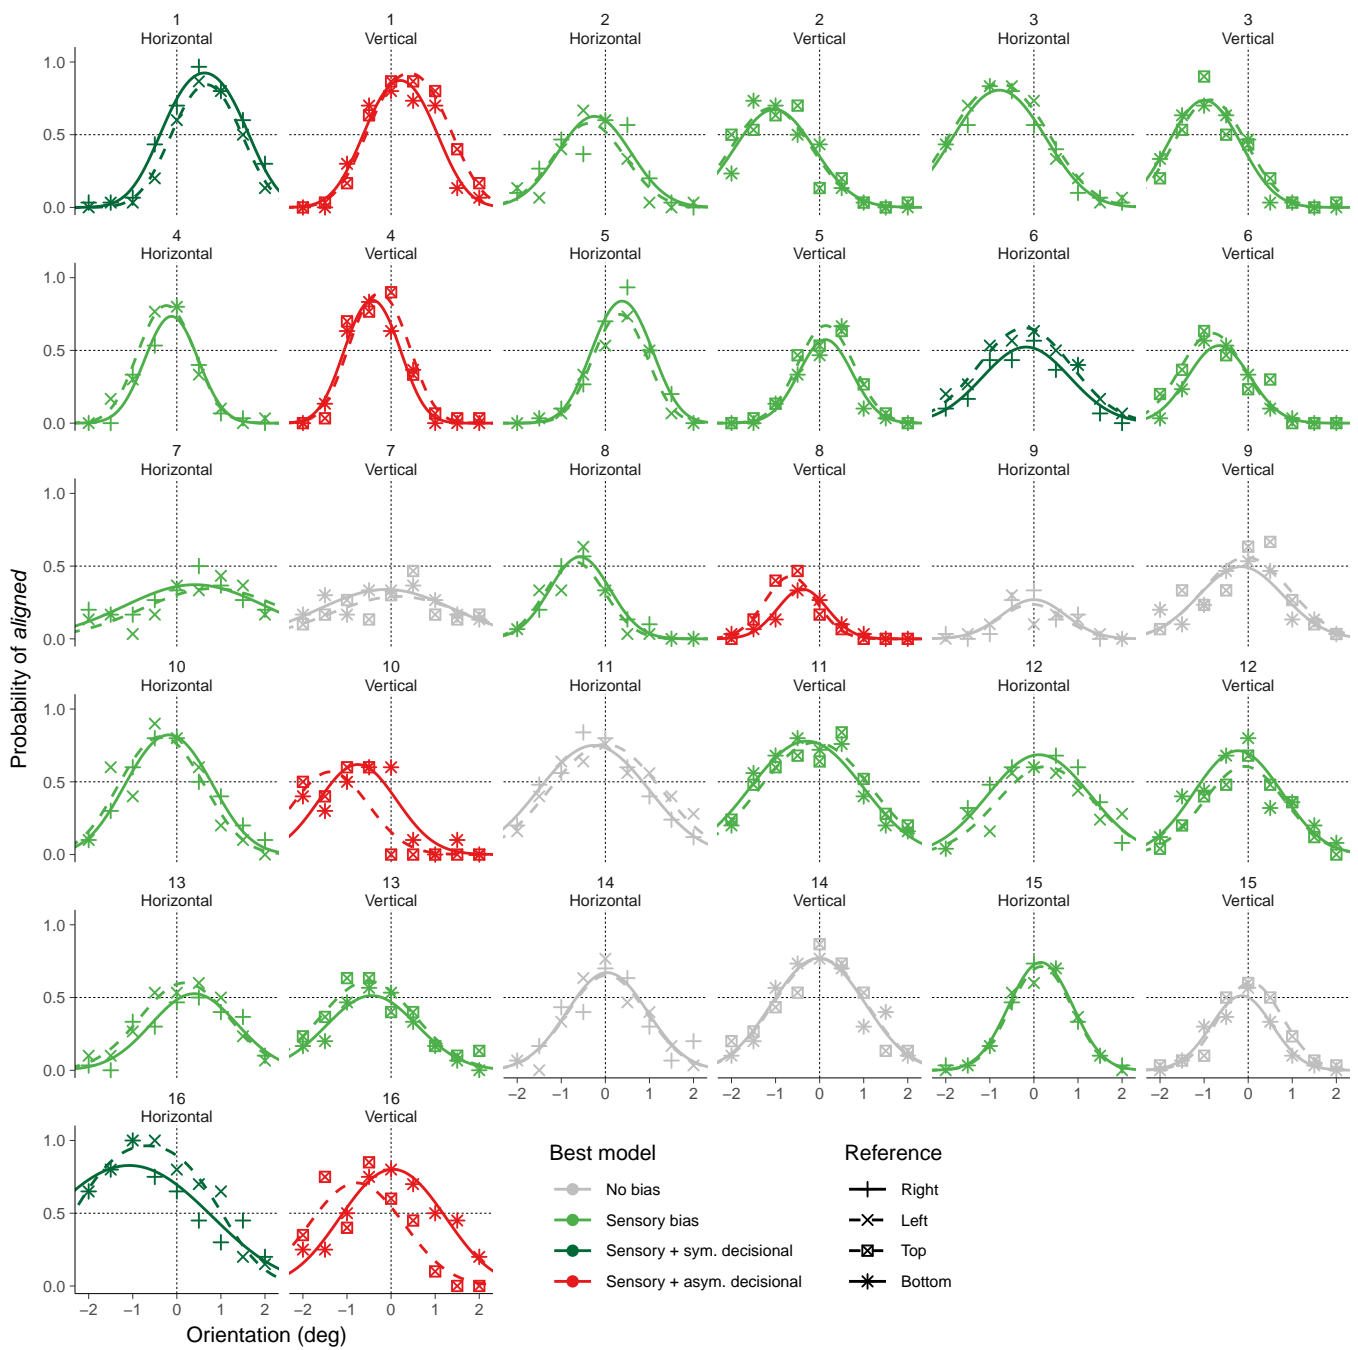

Supplement: supp [file elife-43994-supp-v1.zip]
